# Supplementary material
Source: PubMed Central journal article supplement (PMC6648498)
Supplement: ao8b02534_si_001.pdf [file ao8b02534_si_001.pdf]

**Supplementary Information**  
 **$\beta$ -Cyclodextrin-functionalized Cellulose Nanocrystals and Their**  
**Interactions with Surfactants**

*Feifei Zhang<sup>1</sup>, Muhammad Shahidul Islam<sup>1</sup>, Richard M Berry<sup>2</sup>, Kam Chiu Tam<sup>1,\*</sup>*

<sup>1</sup>Dept. of Chemical Engineering, Waterloo Institute for Nanotechnology, University of Waterloo  
200 University Avenue West, Waterloo, Ontario, Canada N2L 3G1

<sup>2</sup>CelluForce Inc., 625, Président-Kennedy Avenue, Montreal, QC, H3A 1K2, Canada

*\*Corresponding Author:*

*Kam C. Tam,*

*Email: [mkctam@uwaterloo.ca](mailto:mkctam@uwaterloo.ca)*

*Tel: 1-519-888-4567 ext. 38339;*

*Fax: 1-519-888-4347*

## Synthesis of CNC-CD

0.948g MCT- $\beta$ -CD was added to 2 wt% of CNC suspension in DMSO. The mixture was stirred and heated at 90°C for 8h under N<sub>2</sub> atmosphere. Unreacted MCT- $\beta$ -CD was removed by dialysis against water for over 2 weeks.

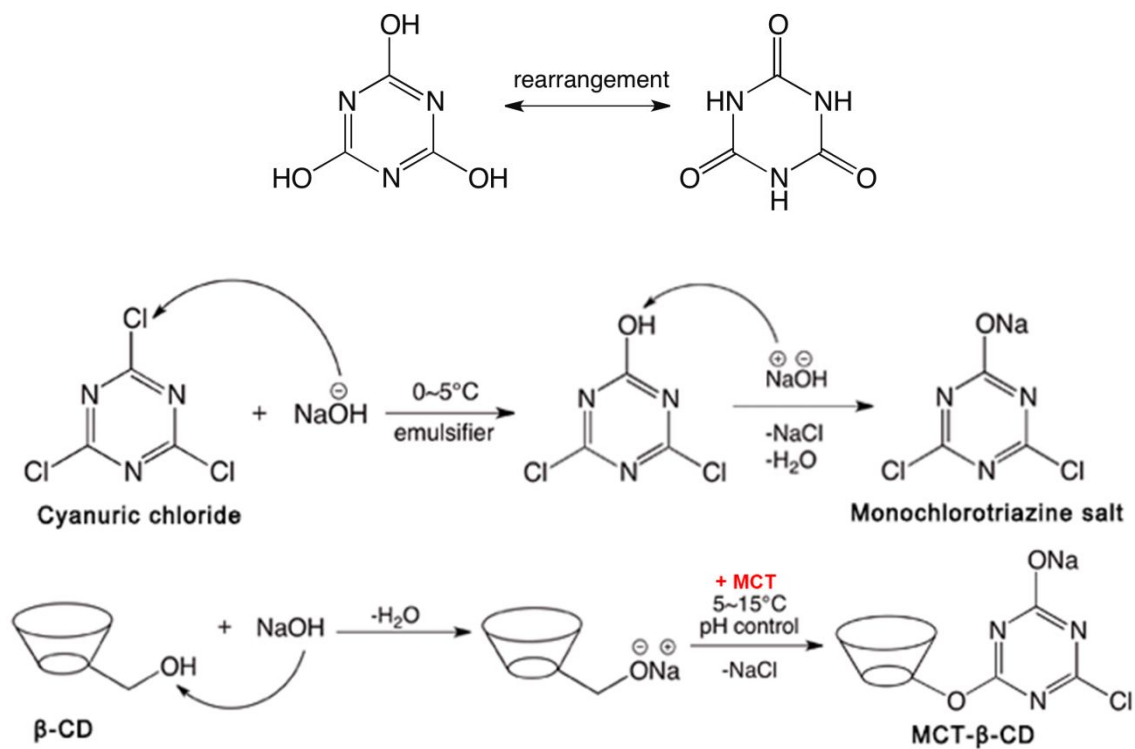

Scheme S1. Rearrangement of cyanuric acid in aqueous solution and synthesis of MCT- $\beta$ -CD.

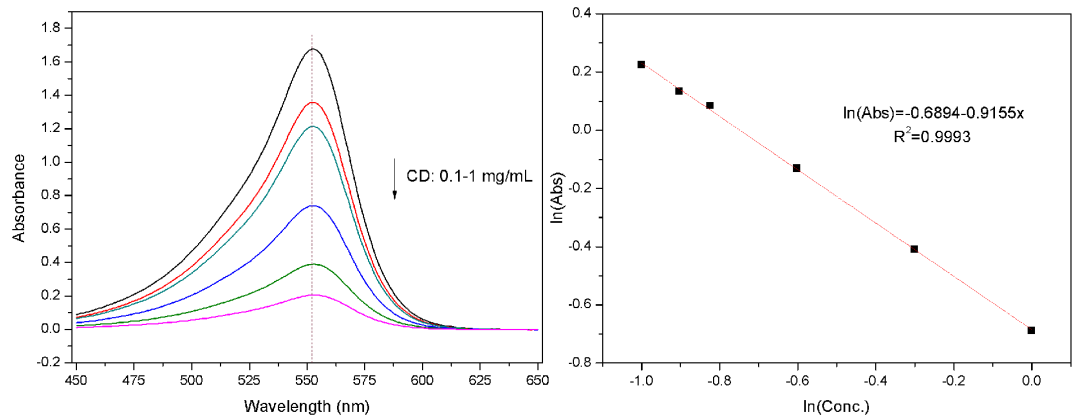

Figure S1. UV absorbance of PHTH/β-CD solutions with increasing β-CD concentrations (left). Calibration curve of absorbance and β-CD concentration (right).

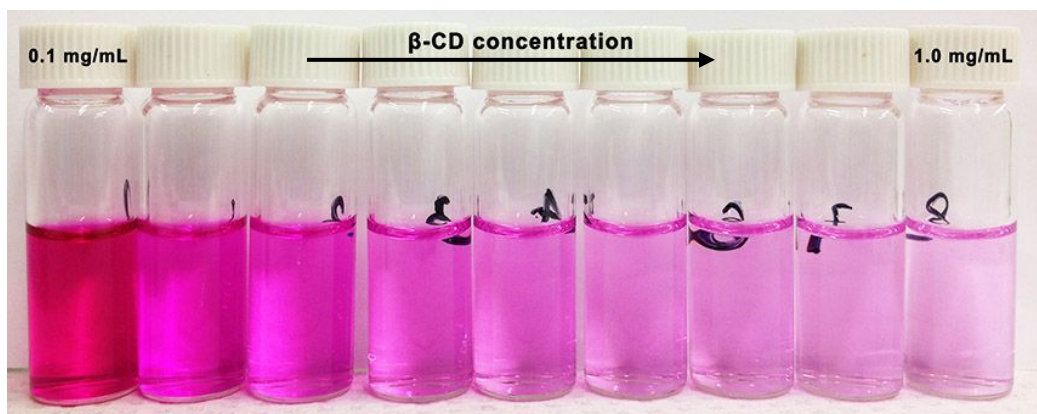

Figure S2. Phenolphthalein solutions with increasing β-CD concentration, where color faded from pink to colorless.

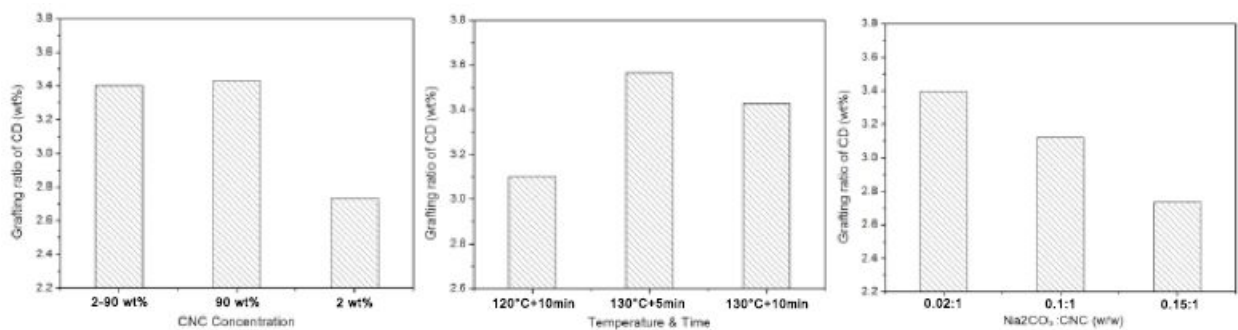

Figure S3. Impact of reaction conditions on the grafting ratio of β-CD: CNC concentration (left), temperature and time (middle), NaCO<sub>3</sub> : CNC ratio (right).

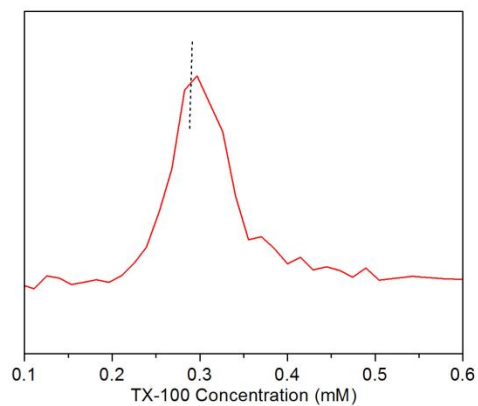

Figure S4. First-order differential curve of TX-100 to water ITC thermogram.

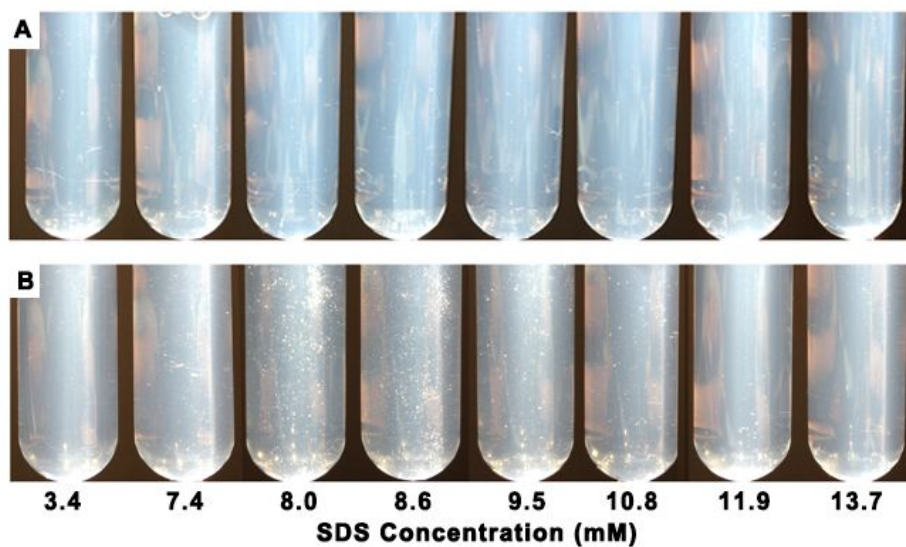

Figure S5. Photos of 0.6 wt% SDS/CNC (A) and SDS/CNC-CD (B) samples with increasing SDS concentration.

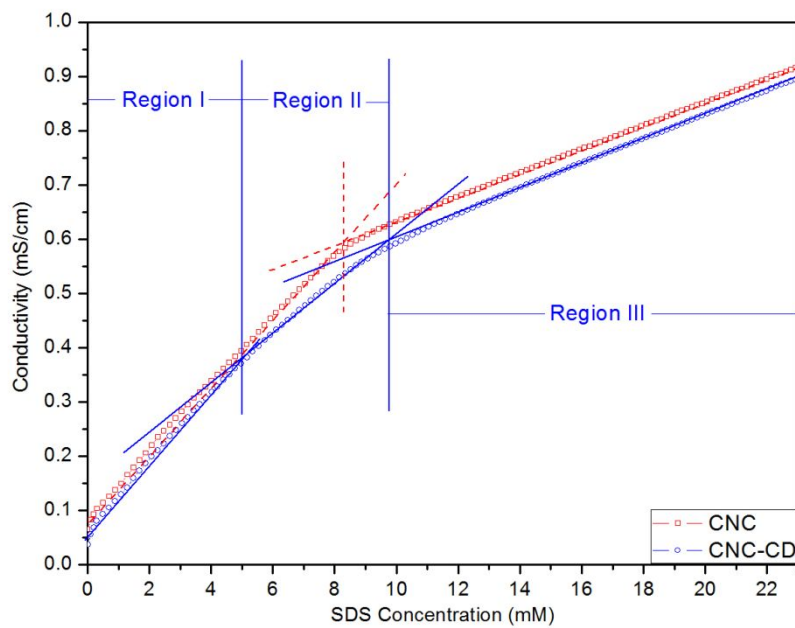

Figure S6. Conductivity of 0.6 wt% CNC and CNC-CD suspensions with increasing SDS concentration at 25°C.

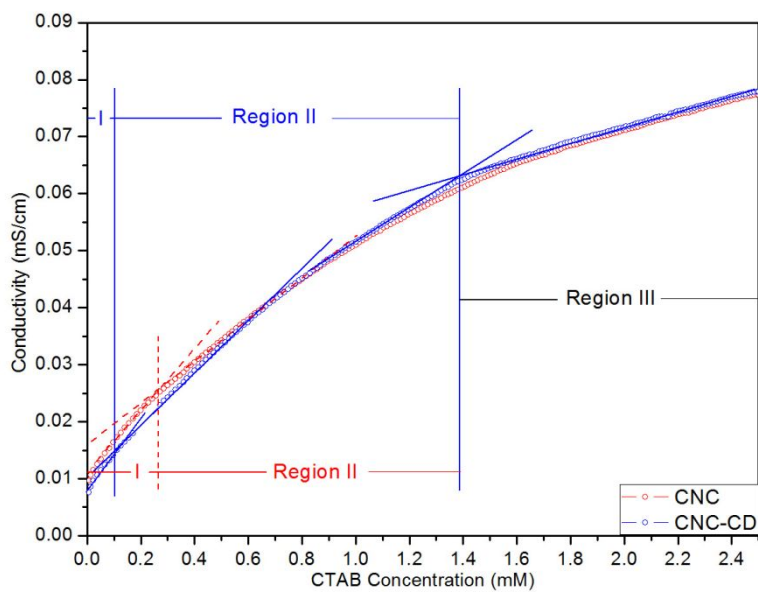

Figure S7. Conductivity of 0.1 wt% CNC and CNC-CD suspensions with increasing CTAB concentration at 28°C.

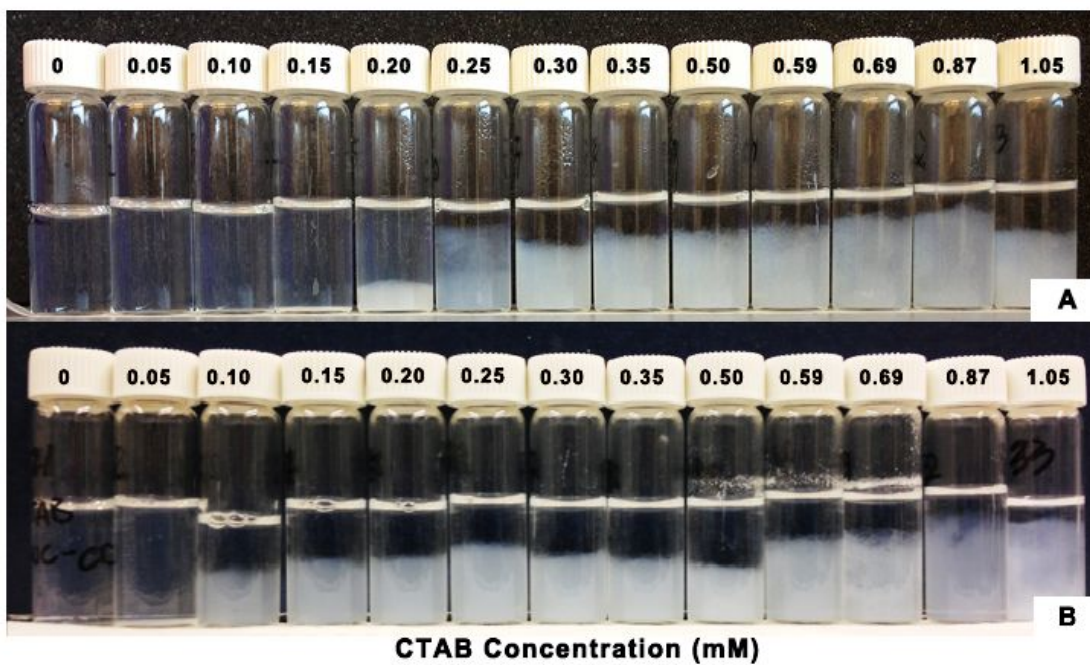

Figure S8. Phase separation of 0.1 wt% CTAB/CNC (A) and CTAB/CNC-CD (B) samples with increasing CTAB concentration.
